# Supplementary material for: Abundance of Lipopolysaccharide Heptosyltransferase I in Human Gut Microbiome and Its Association With Cardiovascular Disease and Liver Cirrhosis
Source: Frontiers journal article supplement (doi:10.3389/fmicb.2021.756976), 2021-11-30
Supplement: Data_Sheet_1.PDF [file Data_Sheet_1.PDF]

## Supplementary Figure 1

A

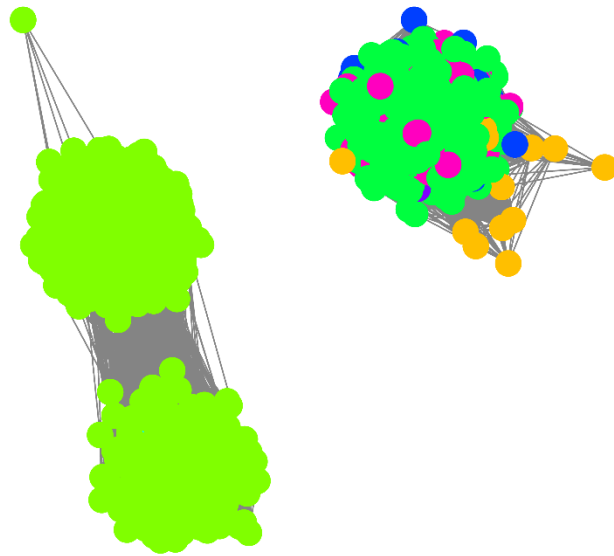

B

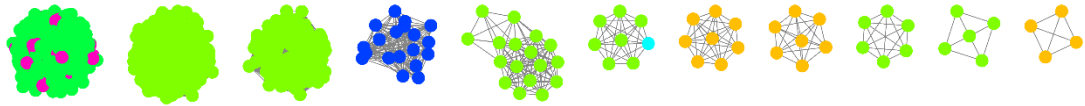

Supplementary Figure 1. HepI from the human gut microbiome analyzed to create the network (A sequence identity>40%; B sequence identity>45%).

## Supplementary Figure 2

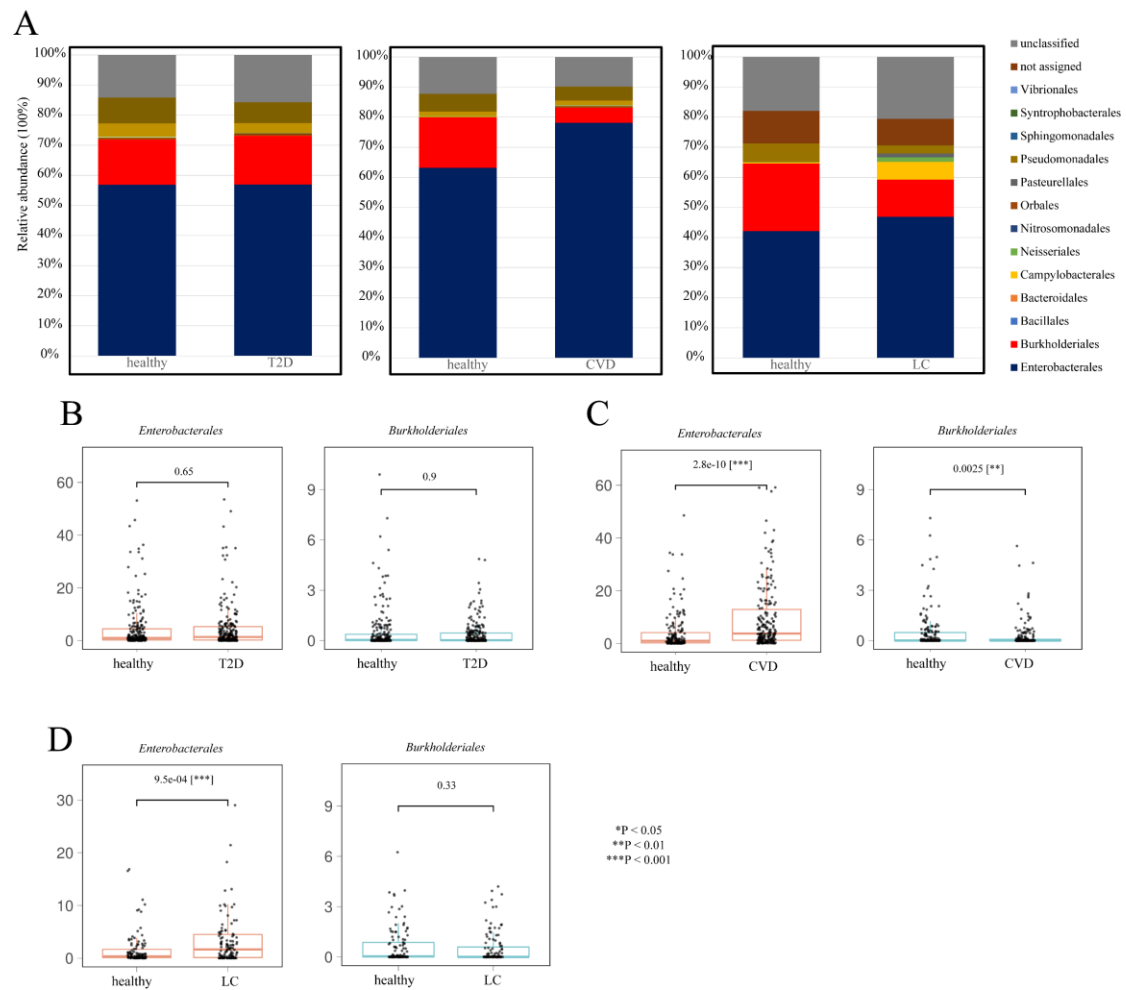

Supplementary Figure 2. Classification at the order level of HpeI and relative abundance of bacteria with HpeI in the healthy and disease conditions. (A) Taxonomic distribution of bacteria with HpeI at the order level in subjects of healthy and the disease conditions; Type 2 diabetes (T2D), cardiovascular disease (CVD), and liver cirrhosis (LC). The abundance of the bacteria with HpeIs from Enterobacterales and Burkholderiales was further compared as the healthy versus disease cohorts (T2D, B; CVD, C; and LC, D). Statistical significance was calculated using the paired Wilcoxon test. The p value was shown above in the figure.

**Supplementary Table 1.** The metagenomic sequencing datasets used in this study.

| Accession number<br>(BioProject) | Accession Number<br>(SRA Study) | Number of<br>control & case(s)                            | Nationality | Age (average $\pm$ S.D.) | Gender<br>Female (%) / Male (%) | Read number    | Abbre. |
|----------------------------------|---------------------------------|-----------------------------------------------------------|-------------|--------------------------|---------------------------------|----------------|--------|
| PRJEB6337                        | ERP005860                       | 114 (healthy) &<br>123 (liver cirrhosis)<br>= 237 (total) | China       | 46 $\pm$ 10.9            | 34.2/65.8                       | 12,235,656,260 | LC     |
| PRJEB21528                       | ERP023788                       | 171 (healthy) &<br>214 (ACVD)<br>= 385 (total)            | China       | 61 $\pm$ 9.8             | 41/59                           | 20,801,326,700 | ACVD   |
| PRJNA422434                      | SRP008047                       | healthy (183) &<br>T2D (187)<br>= total (370)             | China       | 48 $\pm$ 14.3            | 42.4/57.6                       | 15,086,669,032 | T2D    |
| PRJEB1786                        | ERP002469                       | healthy (43) &<br>T2D (53)<br>= total (96)                | Sweden      | 70 $\pm$ 0.1             | 100/0                           | 4,494,103,168  | T2D    |
